# Supplementary material for: Comparison of Conventional and Radiomic Features between 18F-FBPA PET/CT and PET/MR
Source: MDPI journal article supplement (doi:10.3390/biom11111659), 2021-11-09
Supplement: s1 [file s1]

# **SUPPLEMENTAL MATERIALS**

**for**

## **Comparison of Routine and Radiomic Features between $^{18}\text{F}$ - FBPA PET/CT and PET/MR Imaging**

**by**

Chien-Yi Liao, Jun-Hsuang Jen, Yi-Wei Chen, Chien-Ying Li, Ling-Wei Wang, Ren-Shyan Liu,  
Wen-Sheng Huang\*, and Chia-Feng Lu\*

**Table S1** The formulae for the calculation of primary radiomic features.

| <b>Intensity-based features (first order statistics)</b>                                                                                                                               |                                                                                                                                                 |                             |                                                                                                                                |
|----------------------------------------------------------------------------------------------------------------------------------------------------------------------------------------|-------------------------------------------------------------------------------------------------------------------------------------------------|-----------------------------|--------------------------------------------------------------------------------------------------------------------------------|
| <b>X</b> denotes the intensity vector with $N$ voxels of the tumor ROIs; $\bar{X}$ , the mean of <b>X</b> ; <b>P</b> , the first-order histogram with $N_l$ discrete intensity levels. |                                                                                                                                                 |                             |                                                                                                                                |
| Feature                                                                                                                                                                                | Formula                                                                                                                                         | Feature                     | Formula                                                                                                                        |
| 1. Energy                                                                                                                                                                              | $\sum_{i=1}^N \mathbf{X}(i)^2$                                                                                                                  | 2. Entropy                  | $\sum_{i=1}^{N_l} \mathbf{P}(i) \log_2 \mathbf{P}(i)$                                                                          |
| 3. Kurtosis                                                                                                                                                                            | $\frac{\frac{1}{N} \sum_{i=1}^N (\mathbf{X}(i) - \bar{X})^4}{\left( \sqrt{\frac{1}{N} \sum_{i=1}^N (\mathbf{X}(i) - \bar{X})^2} \right)^2} - 3$ | 4. Maximum                  | $\max(\mathbf{X})$                                                                                                             |
| 5. Mean                                                                                                                                                                                | $\frac{1}{N} \sum_{i=1}^N \mathbf{X}(i)$                                                                                                        | 6. Mean absolute deviation  | $\frac{1}{N} \sum_{i=1}^N \text{abs}(\mathbf{X}(i) - \bar{X})$                                                                 |
| 7. Median                                                                                                                                                                              | $\text{median}(\mathbf{X})$                                                                                                                     | 8. First quartile           | Value that splits off the lowest 25% of data from the highest 75%                                                              |
| 9. Third quartile                                                                                                                                                                      | Value that splits off the highest 25% of data from the lowest 75%                                                                               | 10. Minimum                 | $\min(\mathbf{X})$                                                                                                             |
| 11. Range                                                                                                                                                                              | $\max(\mathbf{X}) - \min(\mathbf{X})$                                                                                                           | 12. Root mean square (RMS)  | $\sqrt{\frac{\sum_{i=1}^N \mathbf{X}(i)^2}{N}}$                                                                                |
| 13. Skewness                                                                                                                                                                           | $\frac{\frac{1}{N} \sum_{i=1}^N (\mathbf{X}(i) - \bar{X})^3}{\left( \sqrt{\frac{1}{N} \sum_{i=1}^N (\mathbf{X}(i) - \bar{X})^2} \right)^3}$     | 14. Standard deviation      | $\sqrt{\frac{1}{N} \sum_{i=1}^N (\mathbf{X}(i) - \bar{X})^2}$                                                                  |
| 15. Uniformity                                                                                                                                                                         | $\sum_{i=1}^{N_l} \mathbf{P}(i)^2$                                                                                                              | 16. Variance                | $\frac{1}{N} \sum_{i=1}^N (\mathbf{X}(i) - \bar{X})^2$                                                                         |
| <b>Shape- and Size-based features</b>                                                                                                                                                  |                                                                                                                                                 |                             |                                                                                                                                |
| $V$ , tumor volume; $A$ , surface area of the volume                                                                                                                                   |                                                                                                                                                 |                             |                                                                                                                                |
| 17. Compactness 1                                                                                                                                                                      | $\frac{V}{\sqrt{\pi} A^{3/2}}$                                                                                                                  | 18. Compactness 2           | $36\pi \frac{V^2}{A^3}$                                                                                                        |
| 19. Maximum 3D diameter                                                                                                                                                                | The largest pairwise Euclidean distance between voxels on the surface of the tumor volume.                                                      | 20. Spherical disproportion | $\frac{A}{4\pi R^2}$                                                                                                           |
| 21. Sphericity                                                                                                                                                                         | $\frac{\frac{1}{\pi^3 (6V)^{2/3}}}{A}$                                                                                                          | 22. Surface area            | $A = \sum_{i=1}^{N_s} \frac{1}{2}  a_i b_i \times a_i c_i $<br>$N_s$ , total number of triangles covering the surface; $a, b,$ |

|                                                                                                                                                                                                                                                                                                                                                                                                                                                                                                                                                                                                                                                                                                                                                                                                                                                                                                                                                                                                                                                                         |                                                                                |                                            |                                                                                                          |
|-------------------------------------------------------------------------------------------------------------------------------------------------------------------------------------------------------------------------------------------------------------------------------------------------------------------------------------------------------------------------------------------------------------------------------------------------------------------------------------------------------------------------------------------------------------------------------------------------------------------------------------------------------------------------------------------------------------------------------------------------------------------------------------------------------------------------------------------------------------------------------------------------------------------------------------------------------------------------------------------------------------------------------------------------------------------------|--------------------------------------------------------------------------------|--------------------------------------------|----------------------------------------------------------------------------------------------------------|
|                                                                                                                                                                                                                                                                                                                                                                                                                                                                                                                                                                                                                                                                                                                                                                                                                                                                                                                                                                                                                                                                         |                                                                                |                                            | and c, triangle vertices                                                                                 |
| 23. Surface to volume ratio                                                                                                                                                                                                                                                                                                                                                                                                                                                                                                                                                                                                                                                                                                                                                                                                                                                                                                                                                                                                                                             | $\frac{A}{V}$                                                                  | 24. Volume                                 | Number of pixels in the tumor region multiplied by the voxel size                                        |
| <b>Textural features (gray-level co-occurrence matrix based features)</b><br>$\mathbf{P}(\delta, \alpha)$ , co-occurrence matrix for an arbitrary distance $\delta$ and direction $\alpha$ ; $N_g$ , number of discrete intensity levels in the image; $p_x(i)$ , marginal row probabilities; $p_y(i)$ , marginal column probabilities; $\mu_x$ , mean of $p_x$ ; $\mu_y$ , mean of $p_y$ ; $\sigma_x$ , standard deviation of $p_x$ ; $\sigma_y$ , standard deviation of $p_y$ ; $HXY$ , entropy of $\mathbf{P}$ ; $HX$ , entropy of $p_x$ ; $HY$ , entropy of $p_y$ ;<br>$p_{x+y}(k) = \sum_{i=1}^{N_g} \sum_{j=1}^{N_g} \mathbf{P}(i, j), i + j = k, k = 2, 3, \dots, 2N_g$ ;<br>$p_{x-y}(k) = \sum_{i=1}^{N_g} \sum_{j=1}^{N_g} \mathbf{P}(i, j),  i - j  = k, k = 0, 1, \dots, N_g - 1$ ;<br>$HX = -\sum_{i=1}^{N_g} p_x(i) \log_2(p_x(i)), HY = -\sum_{i=1}^{N_g} p_y(i) \log_2(p_y(i))$ ;<br>$HXY1 = -\sum_{i=1}^{N_g} \sum_{j=1}^{N_g} \mathbf{P}(i, j) \log_2(p_x(i)p_y(j)), HXY2 =$<br>$-\sum_{i=1}^{N_g} \sum_{j=1}^{N_g} p_x(i)p_y(j) \log_2(p_x(i)p_y(j))$ |                                                                                |                                            |                                                                                                          |
| 25. Autocorrelation                                                                                                                                                                                                                                                                                                                                                                                                                                                                                                                                                                                                                                                                                                                                                                                                                                                                                                                                                                                                                                                     | $\sum_{i=1}^{N_g} \sum_{j=1}^{N_g} ij\mathbf{P}(i, j)$                         | 26. Cluster Prominence                     | $\sum_{i=1}^{N_g} \sum_{j=1}^{N_g} [i + j - \mu_x - \mu_y]^4 \mathbf{P}(i, j)$                           |
| 27. Cluster Shade                                                                                                                                                                                                                                                                                                                                                                                                                                                                                                                                                                                                                                                                                                                                                                                                                                                                                                                                                                                                                                                       | $\sum_{i=1}^{N_g} \sum_{j=1}^{N_g} [i + j - \mu_x - \mu_y]^3 \mathbf{P}(i, j)$ | 28. Cluster Tendency                       | $\sum_{i=1}^{N_g} \sum_{j=1}^{N_g} [i + j - \mu_x - \mu_y]^2 \mathbf{P}(i, j)$                           |
| 29. Contrast                                                                                                                                                                                                                                                                                                                                                                                                                                                                                                                                                                                                                                                                                                                                                                                                                                                                                                                                                                                                                                                            | $\sum_{i=1}^{N_g} \sum_{j=1}^{N_g}  i - j ^2 \mathbf{P}(i, j)$                 | 30. Correlation                            | $\sum_{i=1}^{N_g} \sum_{j=1}^{N_g} \frac{ij\mathbf{P}(i, j) - \mu_x(i)\mu_y(j)}{\sigma_x(i)\sigma_y(j)}$ |
| 31. Difference entropy                                                                                                                                                                                                                                                                                                                                                                                                                                                                                                                                                                                                                                                                                                                                                                                                                                                                                                                                                                                                                                                  | $\sum_{i=0}^{N_g-1} p_{x-y}(i) \log_2[p_{x-y}(i)]$                             | 32. Dissimilarity                          | $\sum_{i=1}^{N_g} \sum_{j=1}^{N_g}  i - j  \mathbf{P}(i, j)$                                             |
| 33. Energy                                                                                                                                                                                                                                                                                                                                                                                                                                                                                                                                                                                                                                                                                                                                                                                                                                                                                                                                                                                                                                                              | $\sum_{i=1}^{N_g} \sum_{j=1}^{N_g} [\mathbf{P}(i, j)]^2$                       | 34. Entropy (HXY)                          | $-\sum_{i=1}^{N_g} \sum_{j=1}^{N_g} \mathbf{P}(i, j) \log_2(\mathbf{P}(i, j))$                           |
| 35. Homogeneity 1                                                                                                                                                                                                                                                                                                                                                                                                                                                                                                                                                                                                                                                                                                                                                                                                                                                                                                                                                                                                                                                       | $\sum_{i=1}^{N_g} \sum_{j=1}^{N_g} \frac{\mathbf{P}(i, j)}{1 +  i - j }$       | 36. Homogeneity 2                          | $\sum_{i=1}^{N_g} \sum_{j=1}^{N_g} \frac{\mathbf{P}(i, j)}{1 +  i - j ^2}$                               |
| 37. Informational measure of correlation 1                                                                                                                                                                                                                                                                                                                                                                                                                                                                                                                                                                                                                                                                                                                                                                                                                                                                                                                                                                                                                              | $\frac{HXY - HXY1}{\max(HX, HY)}$                                              | 38. Informational measure of correlation 2 | $\sqrt{1 - e^{-2(HXY2 - HXY)}}$                                                                          |

|                                                                                                                                                                                                                                                                              |                                                                                                                                          |                                       |                                                                                                                                          |
|------------------------------------------------------------------------------------------------------------------------------------------------------------------------------------------------------------------------------------------------------------------------------|------------------------------------------------------------------------------------------------------------------------------------------|---------------------------------------|------------------------------------------------------------------------------------------------------------------------------------------|
| 39. Inverse Difference Moment Normalized                                                                                                                                                                                                                                     | $\sum_{i=1}^{N_g} \sum_{j=1}^{N_g} \frac{\mathbf{P}(i,j)}{1+\left(\frac{ i-j ^2}{N^2}\right)}$                                           | 40. Inverse Difference Normalized     | $\sum_{i=1}^{N_g} \sum_{j=1}^{N_g} \frac{\mathbf{P}(i,j)}{1+\left(\frac{ i-j }{N}\right)}$                                               |
| 41. Inverse variance                                                                                                                                                                                                                                                         | $\sum_{i=1}^{N_g} \sum_{j=1}^{N_g} \frac{\mathbf{P}(i,j)}{ i-j ^2}, i \neq j$                                                            | 42. Maximum Probability               | $\max(\mathbf{P}(i,j))$                                                                                                                  |
| 43. Sum average                                                                                                                                                                                                                                                              | $\sum_{i=2}^{2N_g} [i\mathbf{P}_{x+y}(i)]$                                                                                               | 44. Sum entropy                       | $-\sum_{i=2}^{2N_g} \mathbf{P}_{x+y}(i) \log_2 [\mathbf{P}_{x+y}(i)]$                                                                    |
| 45. Variance                                                                                                                                                                                                                                                                 | $\sum_{i=1}^{N_g} \sum_{j=1}^{N_g} (i - \mu)^2 \mathbf{P}(i,j)$                                                                          |                                       |                                                                                                                                          |
| <b>Textural features (gray-level run-length matrix based features)</b><br>$p(i,j \theta)$ , $(i,j)$ th entry in the given run-length matrix $p$ for a direction $\theta$ ; $N_g$ , number of discrete intensity levels in the image; $N_r$ , number of different run lengths |                                                                                                                                          |                                       |                                                                                                                                          |
| 46. Short Run Emphasis                                                                                                                                                                                                                                                       | $\frac{\sum_{i=1}^{N_g} \sum_{j=1}^{N_r} \left[ \frac{p(i,j \theta)}{j^2} \right]}{\sum_{i=1}^{N_g} \sum_{j=1}^{N_r} p(i,j \theta)}$     | 47. Long Run Emphasis                 | $\frac{\sum_{i=1}^{N_g} \sum_{j=1}^{N_r} j^2 p(i,j \theta)}{\sum_{i=1}^{N_g} \sum_{j=1}^{N_r} p(i,j \theta)}$                            |
| 48. Gray Level Non-Uniformity                                                                                                                                                                                                                                                | $\frac{\sum_{i=1}^{N_g} \left[ \sum_{j=1}^{N_r} p(i,j \theta) \right]^2}{\sum_{i=1}^{N_g} \sum_{j=1}^{N_r} p(i,j \theta)}$               | 49. Run Length Non-Uniformity         | $\frac{\sum_{j=1}^{N_r} \left[ \sum_{i=1}^{N_g} p(i,j \theta) \right]^2}{\sum_{i=1}^{N_g} \sum_{j=1}^{N_r} p(i,j \theta)}$               |
| 50. Run Percentage                                                                                                                                                                                                                                                           | $\sum_{i=1}^{N_g} \sum_{j=1}^{N_r} \frac{p(i,j \theta)}{N_p}$                                                                            | 51. Low Gray Level Run Emphasis       | $\frac{\sum_{i=1}^{N_g} \sum_{j=1}^{N_r} \left[ \frac{p(i,j \theta)}{i^2} \right]}{\sum_{i=1}^{N_g} \sum_{j=1}^{N_r} p(i,j \theta)}$     |
| 52. High Gray Level Run Emphasis                                                                                                                                                                                                                                             | $\frac{\sum_{i=1}^{N_g} \sum_{j=1}^{N_r} i^2 p(i,j \theta)}{\sum_{i=1}^{N_g} \sum_{j=1}^{N_r} p(i,j \theta)}$                            | 53. Short Run Low Gray Level Emphasis | $\frac{\sum_{i=1}^{N_g} \sum_{j=1}^{N_r} \left[ \frac{p(i,j \theta)}{i^2 j^2} \right]}{\sum_{i=1}^{N_g} \sum_{j=1}^{N_r} p(i,j \theta)}$ |
| 54. Short Run High Gray Level Emphasis                                                                                                                                                                                                                                       | $\frac{\sum_{i=1}^{N_g} \sum_{j=1}^{N_r} \left[ \frac{p(i,j \theta) i^2}{j^2} \right]}{\sum_{i=1}^{N_g} \sum_{j=1}^{N_r} p(i,j \theta)}$ | 55. Long Run Low Gray Level Emphasis  | $\frac{\sum_{i=1}^{N_g} \sum_{j=1}^{N_r} \left[ \frac{p(i,j \theta) j^2}{i^2} \right]}{\sum_{i=1}^{N_g} \sum_{j=1}^{N_r} p(i,j \theta)}$ |
| 56. Long Run High Gray Level Emphasis                                                                                                                                                                                                                                        | $\frac{\sum_{i=1}^{N_g} \sum_{j=1}^{N_r} i^2 j^2 p(i,j \theta)}{\sum_{i=1}^{N_g} \sum_{j=1}^{N_r} p(i,j \theta)}$                        |                                       |                                                                                                                                          |

**Table S2** The linear equations for interchanging PET/CT to PET/MR radiomics.

**GLCM:** gray-level co-occurrence matrix. In the column of wavelet filtering, L represents a low-pass filter, and H represents a high-pass filter. The combination of L and H letters stands for the filter type applied to the three image axes in order.

| Wavelet Filtering | Feature Type | Feature Name                                  | Linear transformation formula |              | Correlation |
|-------------------|--------------|-----------------------------------------------|-------------------------------|--------------|-------------|
|                   |              |                                               | m(slope)                      | b(intercept) |             |
| None              | Routine      | Maximum                                       | m=1.1481                      | b=-0.41739   | strong      |
| None              | Routine      | Mean                                          | m=1.0459                      | b=-0.059898  | strong      |
| None              | Routine      | Minimum                                       | m=1.0074                      | b=-0.022207  | strong      |
| None              | Routine      | T/N ratio                                     | m=0.95149                     | b=0.077946   | strong      |
| None              | Histogram    | Root mean square                              | m=1.0557                      | b=-0.078156  | strong      |
| None              | Histogram    | Standard deviation                            | m=1.2221                      | b=-0.048134  | strong      |
| None              | Histogram    | Variance                                      | m=1.347                       | b=-0.011788  | strong      |
| None              | Histogram    | Energy                                        | m=1.3584                      | b=-5028.0672 | strong      |
| None              | Geometric    | Surface area                                  | m=1.0123                      | b=308.6175   | strong      |
| None              | Geometric    | Surface to volume ratio                       | m=1.1079                      | b=-0.036636  | strong      |
| None              | Geometric    | Volume                                        | m=1.1343                      | b=-491.7872  | strong      |
| None              | GLCM         | Contrast                                      | m=1.1573                      | b=-2.0035    | strong      |
| None              | GLCM         | Correlation                                   | m=1.1098                      | b=-0.082595  | strong      |
| None              | GLCM         | Difference entropy                            | m=1.0171                      | b=-0.061313  | strong      |
| None              | Histogram    | Entropy                                       | m=1.0184                      | b=-0.12863   | strong      |
| None              | GLCM         | Dissimilarity                                 | m=1.0525                      | b=-0.14794   | strong      |
| None              | GLCM         | Homogeneity 1                                 | m=0.91885                     | b=0.033259   | strong      |
| None              | GLCM         | Homogeneity 2                                 | m=0.89842                     | b=0.033548   | strong      |
| None              | GLCM         | Informational measure of correlation 1 (IMC1) | m=1.3765                      | b=0.069475   | strong      |
| None              | GLCM         | Inverse Difference Moment Normalized (IDMN)   | m=1.1341                      | b=-0.13243   | strong      |
| None              | GLCM         | Inverse Difference Normalized (IDN)           | m=1.0255                      | b=-0.023373  | strong      |
| None              | GLCM         | Inverse variance                              | m=0.91614                     | b=0.029593   | strong      |
| None              | GLRLM        | Short Run Emphasis (SRE)                      | m=0.90146                     | b=0.090528   | strong      |
| None              | GLRLM        | Long Run Emphasis (LRE)                       | m=0.88318                     | b=0.17176    | strong      |
| None              | GLRLM        | Long Run Emphasis (LRE)                       | m=1.0557                      | b=3.5191     | strong      |
| None              | GLRLM        | Run Length Nonuniformity (RLN)                | m=1.1308                      | b=-60.1364   | strong      |
| None              | GLRLM        | Run Percentage (RP)                           | m=0.89441                     | b=0.093793   | strong      |
| None              | Histogram    | Maximum                                       | m=1.1481                      | b=-0.41739   | strong      |
| None              | GLRLM        | Low Gray-Level Run Emphasis                   | m=0.92278                     | b=0.00027044 | strong      |

|      |           |                                                  |           |               |        |
|------|-----------|--------------------------------------------------|-----------|---------------|--------|
|      |           | (LGLRE)                                          |           |               |        |
| None | GLRLM     | Short Run Low Gray-Level<br>Emphasis (SRLGLE)    | m=0.92792 | b=0.00019282  | strong |
| None | Histogram | Mean                                             | m=1.0459  | b=-0.059898   | strong |
| None | Histogram | Mean absolute deviation                          | m=1.214   | b=-0.034528   | strong |
| None | Histogram | First quartile                                   | m=1.0033  | b=0.013916    | strong |
| None | Histogram | Third quartile                                   | m=1.0564  | b=-0.076298   | strong |
| None | Histogram | Median                                           | m=1.0204  | b=-0.0080993  | strong |
| None | Histogram | Minimum                                          | m=1.0074  | b=-0.022207   | strong |
| None | Histogram | Range                                            | m=1.2079  | b=-0.29923    | strong |
| HHH  | GLCM      | Informational measure of<br>correlation 1 (IMC1) | m=1.4757  | b=0.070997    | strong |
| HHH  | GLRLM     | Long Run Emphasis (LRE)                          | m=1.2181  | b=15.3208     | strong |
| HHH  | GLRLM     | Run Length Nonuniformity<br>(RLN)                | m=1.1313  | b=-122.8677   | strong |
| HHH  | Histogram | Mean                                             | m=1.0664  | b=-4.0764e-07 | strong |
| HHL  | GLCM      | HHL_27_Contrast                                  | m=1.3764  | b=-3.1733     | strong |
| HHL  | GLCM      | Informational measure of<br>correlation 1 (IMC1) | m=1.5816  | b=0.11411     | strong |
| HHL  | GLCM      | Inverse Difference Moment<br>Normalized (IDMN)   | m=1.2847  | b=-0.28258    | strong |
| HHL  | GLRLM     | Long Run Emphasis (LRE)                          | m=1.1269  | b=21.4468     | strong |
| HHL  | GLRLM     | Run Length Nonuniformity<br>(RLN)                | m=1.1909  | b=-191.0173   | strong |
| HHL  | Histogram | Mean                                             | m=0.81878 | b=6.8875e-05  | strong |
| HHL  | Histogram | First quartile                                   | m=1.1725  | b=0.00011033  | strong |
| HHL  | Histogram | Third quartile                                   | m=0.76606 | b=0.00052683  | strong |
| HHL  | Histogram | Median                                           | m=0.82446 | b=6.7727e-06  | strong |
| HLH  | GLCM      | Informational measure of<br>correlation 1 (IMC1) | m=1.3702  | b=0.088694    | strong |
| HLH  | GLCM      | Informational measure of<br>correlation 2 (IMC2) | m=1.3146  | b=-0.31444    | strong |
| HLH  | GLRLM     | Long Run Emphasis (LRE)                          | m=1.2279  | b=16.9739     | strong |
| HLH  | GLRLM     | Run Length Nonuniformity<br>(RLN)                | m=1.1871  | b=-221.0723   | strong |
| HLH  | Histogram | Mean                                             | m=1.4299  | b=-0.00074121 | strong |
| HLH  | Histogram | Mean absolute deviation                          | m=1.2671  | b=-0.00072127 | strong |
| HLH  | Histogram | Third quartile                                   | m=1.1937  | b=-0.00068174 | strong |
| HLH  | Histogram | Median                                           | m=1.03    | b=-0.00015737 | strong |
| HLL  | Histogram | Root mean square                                 | m=0.97143 | b=0.0053578   | strong |

|     |           |                                               |           |              |        |
|-----|-----------|-----------------------------------------------|-----------|--------------|--------|
| HLL | Histogram | Standard deviation                            | m=0.9552  | b=0.0066208  | strong |
| HLL | Histogram | Energy                                        | m=1.5041  | b=-3.9012    | strong |
| HLL | GLCM      | Homogeneity 1                                 | m=0.8817  | b=0.045661   | strong |
| HLL | GLCM      | Informational measure of correlation 1 (IMC1) | m=1.2812  | b=0.086628   | strong |
| HLL | GLCM      | Inverse Difference Normalized (IDN)           | m=1.0939  | b=-0.093541  | strong |
| HLL | GLRLM     | Long Run Emphasis (LRE)                       | m=1.2774  | b=-31.1059   | strong |
| HLL | GLRLM     | Run Length Nonuniformity (RLN)                | m=1.0782  | b=106.6885   | strong |
| HLL | Histogram | Maximum                                       | m=1.6251  | b=-0.057255  | strong |
| HLL | GLRLM     | Low Gray-Level Run Emphasis (LGLRE)           | m=1.5446  | b=-0.0031751 | strong |
| HLL | GLRLM     | Short Run Low Gray-Level Emphasis (SRLGLE)    | m=1.5081  | b=-0.0026925 | strong |
| HLL | Histogram | Mean                                          | m=1.0295  | b=0.0026863  | strong |
| HLL | Histogram | Mean absolute deviation                       | m=0.95506 | b=0.004957   | strong |
| HLL | Histogram | First quartile                                | m=1.0371  | b=0.0015943  | strong |
| HLL | Histogram | Third quartile                                | m=1.0107  | b=0.0051451  | strong |
| HLL | Histogram | Median                                        | m=1.057   | b=0.004216   | strong |
| LHH | GLCM      | Informational measure of correlation 1 (IMC1) | m=1.7285  | b=0.15845    | strong |
| LHH | GLRLM     | Long Run Emphasis (LRE)                       | m=1.3195  | b=-45.6702   | strong |
| LHH | GLRLM     | Run Length Nonuniformity (RLN)                | m=1.0921  | b=65.0231    | strong |
| LHH | GLRLM     | Short Run Low Gray-Level Emphasis (SRLGLE)    | m=0.68515 | b=0.00085063 | strong |
| LHH | Histogram | Mean                                          | m=0.90817 | b=0.0002401  | strong |
| LHH | Histogram | Third quartile                                | m=0.89104 | b=0.0016329  | strong |
| LHL | Histogram | Root mean square                              | m=0.78272 | b=0.016021   | strong |
| LHL | Histogram | Energy                                        | m=1.4025  | b=-6.6916    | strong |
| LHL | GLCM      | Informational measure of correlation 1 (IMC1) | m=1.1895  | b=0.052149   | strong |
| LHL | GLRLM     | Long Run Emphasis (LRE)                       | m=1.0949  | b=-6.774     | strong |
| LHL | GLRLM     | Run Length Nonuniformity (RLN)                | m=1.2719  | b=-305.5976  | strong |
| LHL | Histogram | Mean                                          | m=0.90988 | b=-0.0019788 | strong |
| LHL | Histogram | First quartile                                | m=0.84025 | b=-0.011086  | strong |
| LHL | Histogram | Median                                        | m=1.0889  | b=0.0051367  | strong |
| LLH | Histogram | Root mean square                              | m=1.0572  | b=-0.0060701 | strong |

|     |           |                                               |           |               |        |
|-----|-----------|-----------------------------------------------|-----------|---------------|--------|
| LLH | Histogram | Variance                                      | m=1.296   | b=-0.0099193  | strong |
| LLH | Histogram | Energy                                        | m=1.5366  | b=-68.2035    | strong |
| LLH | GLCM      | Contrast                                      | m=1.2871  | b=-1.6771     | strong |
| LLH | GLCM      | Dissimilarity                                 | m=1.0956  | b=-0.11026    | strong |
| LLH | GLCM      | Informational measure of correlation 1 (IMC1) | m=1.0896  | b=0.036793    | strong |
| LLH | GLCM      | Inverse Difference Moment Normalized (IDMN)   | m=1.2586  | b=-0.25723    | strong |
| LLH | GLCM      | Inverse Difference Normalized (IDN)           | m=1.057   | b=-0.055888   | strong |
| LLH | GLCM      | Inverse variance                              | m=1.017   | b=-0.0091163  | strong |
| LLH | GLRLM     | Long Run Emphasis (LRE)                       | m=1.0958  | b=10.234      | strong |
| LLH | GLRLM     | Run Length Nonuniformity (RLN)                | m=1.2139  | b=-207.1562   | strong |
| LLH | GLRLM     | Long Run High Gray-Level Emphasis (LRHGLE)    | m=0.77455 | b=111.8703    | strong |
| LLH | Histogram | Mean                                          | m=0.99997 | b=-0.0030661  | strong |
| LLH | Histogram | First quartile                                | m=1.0206  | b=0.00049289  | strong |
| LLH | Histogram | Median                                        | m=1.0423  | b=0.0031652   | strong |
| LLL | Histogram | Root mean square                              | m=1.0564  | b=-0.22442    | strong |
| LLL | Histogram | Standard deviation                            | m=1.2201  | b=-0.12987    | strong |
| LLL | Histogram | Uniformity                                    | m=1.0354  | b=-0.0077893  | strong |
| LLL | Histogram | Variance                                      | m=1.3461  | b=-0.087023   | strong |
| LLL | Histogram | Energy                                        | m=1.3587  | b=-39999.2416 | strong |
| LLL | GLCM      | Contrast                                      | m=1.0855  | b=-1.2725     | strong |
| LLL | GLCM      | Correlation                                   | m=1.073   | b=-0.052559   | strong |
| LLL | GLCM      | Difference entropy                            | m=0.99392 | b=-0.0048896  | strong |
| LLL | Histogram | Entropy                                       | m=1.1289  | b=-0.19933    | strong |
| LLL | GLCM      | Dissimilarity                                 | m=1.0261  | b=-0.091335   | strong |
| LLL | GLCM      | Homogeneity 1                                 | m=0.9473  | b=0.021714    | strong |
| LLL | GLCM      | Homogeneity 2                                 | m=0.93351 | b=0.021739    | strong |
| LLL | GLCM      | Informational measure of correlation 1 (IMC1) | m=1.4358  | b=0.081347    | strong |
| LLL | GLCM      | Inverse Difference Moment Normalized (IDMN)   | m=1.0706  | b=-0.06959    | strong |
| LLL | GLCM      | Inverse Difference Normalized (IDN)           | m=1.0106  | b=-0.0092556  | strong |
| LLL | GLCM      | Inverse variance                              | m=0.93615 | b=0.022172    | strong |
| LLL | GLRLM     | Short Run Emphasis (SRE)                      | m=0.93602 | b=0.059231    | strong |
| LLL | GLRLM     | Long Run Emphasis (LRE)                       | m=0.91495 | b=0.13222     | strong |



|      |           |                                             |           |               |          |
|------|-----------|---------------------------------------------|-----------|---------------|----------|
| LLL  | GLRLM     | Long Run Emphasis (LRE)                     | m=1.0658  | b=2.7072      | strong   |
| LLL  | GLRLM     | Run Length Nonuniformity (RLN)              | m=1.1199  | b=-34.1273    | strong   |
| LLL  | GLRLM     | Run Percentage (RP)                         | m=0.92702 | b=0.06479     | strong   |
| LLL  | Histogram | Maximum                                     | m=1.1604  | b=-1.247      | strong   |
| LLL  | Histogram | Mean                                        | m=1.0468  | b=-0.1745     | strong   |
| LLL  | Histogram | Mean absolute deviation                     | m=1.211   | b=-0.092567   | strong   |
| LLL  | Histogram | First quartile                              | m=1.0022  | b=0.038482    | strong   |
| LLL  | Histogram | Third quartile                              | m=1.0569  | b=-0.21749    | strong   |
| LLL  | Histogram | Median                                      | m=1.022   | b=-0.028474   | strong   |
| LLL  | Histogram | Minimum                                     | m=1.032   | b=-0.16221    | strong   |
| LLL  | Histogram | Range                                       | m=1.215   | b=-0.82061    | strong   |
| None | GLCM      | Sum Average                                 | m=0.84835 | b=5.9044      | Moderate |
| None | GLCM      | Sum entropy                                 | m=1.13    | b=-0.65971    | Moderate |
| None | GLCM      | Variance                                    | m=0.93118 | b=3.3601      | Moderate |
| None | GLRLM     | Short Run High Gray-Level Emphasis (SRHGLE) | m=0.81696 | b=56.9359     | Moderate |
| HHH  | GLCM      | Cluster Prominence                          | m=1.072   | b=-1441.5731  | Moderate |
| HHH  | GLCM      | Cluster Shade                               | m=1.072   | b=-1441.5731  | Moderate |
| HHH  | GLCM      | Cluster Tendency                            | m=0.69838 | b=3.4009      | Moderate |
| HHH  | GLCM      | Contrast                                    | m=1.1911  | b=-1.9589     | Moderate |
| HHH  | GLCM      | Inverse Difference Moment Normalized (IDMN) | m=1.0912  | b=-0.090216   | Moderate |
| HHH  | GLCM      | Sum variance                                | m=0.69838 | b=3.4009      | Moderate |
| HHH  | GLCM      | Variance                                    | m=0.79693 | b=0.56632     | Moderate |
| HHH  | GLRLM     | Low Gray-Level Run Emphasis (LGLRE)         | m=2.2759  | b=-0.0053348  | Moderate |
| HHH  | GLRLM     | Short Run Low Gray-Level Emphasis (SRLGLE)  | m=2.2131  | b=-0.0046664  | Moderate |
| HHH  | Histogram | Mean absolute deviation                     | m=1.0889  | b=7.0816e-05  | Moderate |
| HHH  | GLCM      | Third quartile                              | m=1.0278  | b=3.7278e-05  | Moderate |
| HHL  | GLCM      | Cluster Tendency                            | m=0.79484 | b=3.4594      | Moderate |
| HHL  | GLCM      | Sum variance                                | m=0.79484 | b=3.4594      | Moderate |
| HLH  | Histogram | Variance                                    | m=2.0257  | b=-5.0796e-05 | Moderate |
| HLH  | GLCM      | Contrast                                    | m=1.3021  | b=-2.6103     | Moderate |
| HLH  | Histogram | Minimum                                     | m=1.2039  | b=-0.0040663  | Moderate |
| HLL  | GLCM      | Contrast                                    | m=2.1658  | b=-8.167      | Moderate |
| HLL  | GLCM      | Inverse Difference Moment Normalized (IDMN) | m=1.7495  | b=-0.74524    | Moderate |
| HLL  | GLRLM     | Long Run Low Gray-Level                     | m=1.6604  | b=-0.0057476  | Moderate |

|      |           |                                                  |           |               |          |
|------|-----------|--------------------------------------------------|-----------|---------------|----------|
|      |           | Emphasis (LRLGLE)                                |           |               |          |
| LHH  | GLCM      | Autocorrelation                                  | m=1.0249  | b=25.4796     | Moderate |
| LHH  | GLCM      | Homogeneity 1                                    | m=0.86576 | b=0.052965    | Moderate |
| LHH  | GLCM      | Homogeneity 2                                    | m=0.83322 | b=0.054322    | Moderate |
| LHH  | GLRLM     | Short Run Emphasis (SRE)                         | m=0.80367 | b=0.17783     | Moderate |
| LHH  | GLRLM     | Long Run Emphasis (LRE)                          | m=0.78401 | b=0.37721     | Moderate |
| LHH  | GLRLM     | Short Run High Gray-Level<br>Emphasis (SRHGLE)   | m=1.0733  | b=14.6552     | Moderate |
| LHL  | Histogram | Variance                                         | m=0.40945 | b=0.0026411   | Moderate |
| LHL  | GLCM      | Energy                                           | m=0.51484 | b=0.0059592   | Moderate |
| LHL  | GLCM      | Informational measure of<br>correlation 2 (IMC2) | m=0.73617 | b=0.22331     | Moderate |
| LHL  | GLRLM     | Short Run Low Gray-Level<br>Emphasis (SRLGLE)    | m=0.71685 | b=0.0017199   | Moderate |
| LLH  | GLCM      | Correlation                                      | m=1.1635  | b=-0.16002    | Moderate |
| LLH  | GLCM      | Sum entropy                                      | m=0.64732 | b=1.7908      | Moderate |
| LLL  | GLCM      | Cluster Tendency                                 | m=0.98021 | b=7.2613      | Moderate |
| LLL  | GLCM      | Sum variance                                     | m=0.98021 | b=7.2613      | Moderate |
| LLL  | GLRLM     | Long Run Low Gray-Level<br>Emphasis (LRLGLE)     | m=0.89588 | b=0.0010179   | Moderate |
| HHL  | Histogram | Energy                                           | m=2.0707  | b=-0.023434   | Moderate |
| HLH  | Histogram | Energy                                           | m=2.1132  | b=-0.094791   | Moderate |
| LHH  | Histogram | Energy                                           | m=2.0924  | b=-0.24824    | Moderate |
| None | Geometric | Compactness 1                                    | m=0.71137 | b=0.0071792   | Moderate |
| None | Geometric | Compactness 2                                    | m=0.71503 | b=0.060861    | Moderate |
| None | Geometric | Maximum 3D diameter                              | m=0.84147 | b=10.6605     | Moderate |
| None | Geometric | Spherical disproportion                          | m=0.64702 | b=0.57112     | Moderate |
| None | Geometric | Sphericity                                       | m=0.70473 | b=0.17903     | Moderate |
| None | GLCM      | Energy                                           | m=0.82771 | b=0.001164    | Moderate |
| None | GLCM      | Entropy                                          | m=1.009   | b=-0.080026   | Moderate |
| None | GLCM      | Informational measure of<br>correlation 2 (IMC2) | m=1.0538  | b=-0.046663   | Moderate |
| None | Histogram | Kurtosis                                         | m=0.73172 | b=-0.14234    | Moderate |
| None | GLRLM     | Long Run Low Gray-Level<br>Emphasis (LRLGLE)     | m=0.90849 | b=0.00074211  | Moderate |
| None | GLRLM     | Long Run High Gray-Level<br>Emphasis (LRHGLE)    | m=0.87354 | b=73.7655     | Moderate |
| HHH  | GLCM      | Informational measure of<br>correlation 2 (IMC2) | m=1.0173  | b=-0.068867   | Moderate |
| HHH  | Histogram | First quartile                                   | m=0.79783 | b=-0.00012468 | Moderate |

|     |           |                                               |           |              |          |
|-----|-----------|-----------------------------------------------|-----------|--------------|----------|
| HHL | Histogram | Root mean square                              | m=0.72361 | b=0.0011964  | Moderate |
| HHL | Histogram | Standard deviation                            | m=0.71009 | b=0.0011911  | Moderate |
| HHL | Histogram | Cluster Prominence                            | m=0.99505 | b=-1177.4201 | Moderate |
| HHL | GLCM      | Cluster Shade                                 | m=0.99505 | b=-1177.4201 | Moderate |
| HHL | GLCM      | Difference entropy                            | m=0.76368 | b=0.69238    | Moderate |
| HHL | GLCM      | Dissimilarity                                 | m=1.0227  | b=0.022608   | Moderate |
| HHL | GLCM      | Homogeneity 1                                 | m=0.70264 | b=0.13598    | Moderate |
| HHL | GLCM      | Homogeneity 2                                 | m=0.66695 | b=0.1302     | Moderate |
| HHL | GLCM      | Informational measure of correlation 2 (IMC2) | m=1.0393  | b=-0.078437  | Moderate |
| HHL | GLCM      | Inverse Difference Normalized (IDN)           | m=0.94095 | b=0.053722   | Moderate |
| HHL | GLCM      | Inverse variance                              | m=0.66527 | b=0.11462    | Moderate |
| HHL | GLCM      | Variance                                      | m=0.95759 | b=-0.44963   | Moderate |
| HHL | GLRLM     | Short Run Emphasis (SRE)                      | m=0.66981 | b=0.28988    | Moderate |
| HHL | GLRLM     | Run Percentage (RP)                           | m=0.69132 | b=0.25631    | Moderate |
| HHL | GLRLM     | Short Run Low Gray-Level Emphasis (SRLGLE)    | m=0.63422 | b=0.002371   | Moderate |
| HHL | Histogram | Mean absolute deviation                       | m=0.72196 | b=0.00078952 | Moderate |
| HHL | Histogram | Minimum                                       | m=1.5113  | b=0.00318    | Moderate |
| HLH | Histogram | Root mean square                              | m=1.4189  | b=-0.002102  | Moderate |
| HLH | Histogram | Standard deviation                            | m=1.4043  | b=-0.0018919 | Moderate |
| HLH | Histogram | Uniformity                                    | m=0.91815 | b=0.01355    | Moderate |
| HLH | GLCM      | Cluster Prominence                            | m=0.78485 | b=-1633.5169 | Moderate |
| HLH | GLCM      | Cluster Shade                                 | m=0.78485 | b=-1633.5169 | Moderate |
| HLH | GLCM      | Cluster Tendency                              | m=0.79054 | b=-1.481     | Moderate |
| HLH | GLCM      | Difference entropy                            | m=0.8383  | b=0.44374    | Moderate |
| HLH | Histogram | Entropy                                       | m=0.83982 | b=0.54499    | Moderate |
| HLH | GLCM      | Dissimilarity                                 | m=0.98169 | b=0.041344   | Moderate |
| HLH | GLCM      | Energy                                        | m=0.8104  | b=0.0054747  | Moderate |
| HLH | GLCM      | Entropy                                       | m=0.77123 | b=1.3602     | Moderate |
| HLH | GLCM      | Homogeneity 1                                 | m=0.81639 | b=0.088045   | Moderate |
| HLH | GLCM      | Homogeneity 2                                 | m=0.80238 | b=0.081577   | Moderate |
| HLH | GLCM      | Inverse Difference Moment Normalized (IDMN)   | m=1.1973  | b=-0.19567   | Moderate |
| HLH | GLCM      | Inverse Difference Normalized (IDN)           | m=0.92602 | b=0.069623   | Moderate |
| HLH | GLCM      | Inverse variance                              | m=0.78103 | b=0.0782     | Moderate |
| HLH | Histogram | Kurtosis                                      | m=0.88218 | b=0.99808    | Moderate |
| HLH | GLCM      | Inverse variance                              | m=0.94335 | b=0.011658   | Moderate |

|     |           |                                               |           |              |          |
|-----|-----------|-----------------------------------------------|-----------|--------------|----------|
| HLH | GLCM      | Sum entropy                                   | m=0.83696 | b=0.57897    | Moderate |
| HLH | GLCM      | Sum variance                                  | m=0.79054 | b=-1.481     | Moderate |
| HLH | GLCM      | Variance                                      | m=0.88417 | b=-1.2714    | Moderate |
| HLH | GLRLM     | Short Run Emphasis (SRE)                      | m=0.82272 | b=0.1536     | Moderate |
| HLH | GLRLM     | Long Run Emphasis (LRE)                       | m=0.78585 | b=0.45413    | Moderate |
| HLH | GLRLM     | Run Percentage (RP)                           | m=0.84513 | b=0.12534    | Moderate |
| HLH | Histogram | Maximum                                       | m=1.5746  | b=-0.0061247 | Moderate |
| HLH | Histogram | First quartile                                | m=1.1566  | b=0.00017507 | Moderate |
| HLH | Histogram | Range                                         | m=1.4855  | b=-0.0076024 | Moderate |
| HLL | Histogram | Variance                                      | m=0.98513 | b=0.00057859 | Moderate |
| HLL | GLCM      | Cluster Prominence                            | m=1.2881  | b=-7793.0379 | Moderate |
| HLL | GLCM      | Cluster Shade                                 | m=1.2881  | b=-7793.0379 | Moderate |
| HLL | GLCM      | Cluster Tendency                              | m=1.1287  | b=-13.8947   | Moderate |
| HLL | GLCM      | Difference entropy                            | m=0.97735 | b=0.1771     | Moderate |
| HLL | GLCM      | Dissimilarity                                 | m=1.2505  | b=-0.29957   | Moderate |
| HLL | GLCM      | Homogeneity 2                                 | m=0.85932 | b=0.045389   | Moderate |
| HLL | GLCM      | Informational measure of correlation 2 (IMC2) | m=1.1964  | b=-0.20906   | Moderate |
| HLL | GLCM      | Inverse variance                              | m=0.82106 | b=0.04549    | Moderate |
| HLL | GLCM      | Sum variance                                  | m=1.1287  | b=-13.8947   | Moderate |
| HLL | GLCM      | Variance                                      | m=1.3702  | b=-7.6208    | Moderate |
| HLL | GLRLM     | Short Run Emphasis (SRE)                      | m=0.95379 | b=0.040976   | Moderate |
| HLL | GLRLM     | Long Run Emphasis (LRE)                       | m=1.0058  | b=0.064405   | Moderate |
| HLL | GLRLM     | Run Percentage (RP)                           | m=0.92356 | b=0.064118   | Moderate |
| HLL | GLRLM     | Long Run High Gray-Level Emphasis (LRHGLE)    | m=0.77879 | b=199.7316   | Moderate |
| HLL | Histogram | Minimum                                       | m=1.1082  | b=-0.008778  | Moderate |
| HLL | Histogram | Range                                         | m=1.2954  | b=-0.05527   | Moderate |
| LHH | Histogram | Root mean square                              | m=0.74966 | b=0.0037429  | Moderate |
| LHH | Histogram | Standard deviation                            | m=0.74494 | b=0.0037296  | Moderate |
| LHH | GLCM      | Cluster Prominence                            | m=1.1496  | b=-3796.7446 | Moderate |
| LHH | GLCM      | Cluster Shade                                 | m=1.1496  | b=-3796.7446 | Moderate |
| LHH | GLCM      | Cluster Tendency                              | m=1.0684  | b=-9.2888    | Moderate |
| LHH | GLCM      | Contrast                                      | m=1.416   | b=-3.8555    | Moderate |
| LHH | GLCM      | Difference entropy                            | m=0.69232 | b=0.84121    | Moderate |
| LHH | GLCM      | Dissimilarity                                 | m=1.1603  | b=-0.29619   | Moderate |
| LHH | GLCM      | Informational measure of correlation 2 (IMC2) | m=0.9752  | b=-0.02059   | Moderate |
| LHH | GLCM      | Inverse Difference Moment Normalized (IDMN)   | m=1.3645  | b=-0.36142   | Moderate |

|     |           |                                                |           |             |          |
|-----|-----------|------------------------------------------------|-----------|-------------|----------|
| LHH | GLCM      | Inverse Difference<br>Normalized (IDN)         | m=1.1032  | b=-0.098496 | Moderate |
| LHH | GLCM      | Inverse variance                               | m=0.9567  | b=0.0079207 | Moderate |
| LHH | GLCM      | Sum Average                                    | m=0.92294 | b=4.2864    | Moderate |
| LHH | GLCM      | Sum variance                                   | m=1.0684  | b=-9.2888   | Moderate |
| LHH | GLCM      | Variance                                       | m=1.148   | b=-3.623    | Moderate |
| LHH | GLRLM     | Run Percentage (RP)                            | m=0.81269 | b=0.16242   | Moderate |
| LHH | GLRLM     | Long Run Low Gray-Level<br>Emphasis (LRLGLE)   | m=0.58399 | b=0.0030436 | Moderate |
| LHH | Histogram | Mean absolute deviation                        | m=0.7536  | b=0.0027097 | Moderate |
| LHH | Histogram | First quartile                                 | m=0.80593 | b=-0.00139  | Moderate |
| LHL | Histogram | Standard deviation                             | m=0.65397 | b=0.021076  | Moderate |
| LHL | GLCM      | Cluster Prominence                             | m=0.70656 | b=2848.469  | Moderate |
| LHL | GLCM      | Cluster Shade                                  | m=0.70656 | b=2848.469  | Moderate |
| LHL | GLCM      | Cluster Tendency                               | m=0.73421 | b=14.526    | Moderate |
| LHL | GLCM      | Contrast                                       | m=0.69002 | b=4.0477    | Moderate |
| LHL | GLCM      | Difference entropy                             | m=0.64007 | b=0.98512   | Moderate |
| LHL | GLCM      | Dissimilarity                                  | m=0.72082 | b=0.69126   | Moderate |
| LHL | GLCM      | Homogeneity 1                                  | m=0.67959 | b=0.14453   | Moderate |
| LHL | GLCM      | Homogeneity 2                                  | m=0.67086 | b=0.12601   | Moderate |
| LHL | GLCM      | Inverse Difference Moment<br>Normalized (IDMN) | m=0.70565 | b=0.29083   | Moderate |
| LHL | GLCM      | Inverse Difference<br>Normalized (IDN)         | m=0.72149 | b=0.25981   | Moderate |
| LHL | GLCM      | Inverse variance                               | m=0.71777 | b=0.099513  | Moderate |
| LHL | GLCM      | Sum variance                                   | m=0.73421 | b=14.526    | Moderate |
| LHL | GLCM      | Variance                                       | m=0.74859 | b=4.1394    | Moderate |
| LHL | GLRLM     | Short Run Emphasis (SRE)                       | m=0.66144 | b=0.30021   | Moderate |
| LHL | GLRLM     | Long Run Emphasis (LRE)                        | m=0.64207 | b=0.64885   | Moderate |
| LHL | GLRLM     | Run Percentage (RP)                            | m=0.6849  | b=0.26584   | Moderate |
| LHL | Histogram | Maximum                                        | m=0.88462 | b=0.020972  | Moderate |
| LHL | Histogram | Mean absolute deviation                        | m=0.67643 | b=0.015334  | Moderate |
| LHL | Histogram | Third quartile                                 | m=1.1071  | b=0.0023946 | Moderate |
| LHL | Histogram | Minimum                                        | m=0.77128 | b=-0.067997 | Moderate |
| LHL | Histogram | Range                                          | m=0.86806 | b=0.06089   | Moderate |
| LLH | Histogram | Standard deviation                             | m=1.0826  | b=-0.011418 | Moderate |
| LLH | GLCM      | Autocorrelation                                | m=0.87433 | b=40.0353   | Moderate |
| LLH | GLCM      | Cluster Prominence                             | m=0.61516 | b=9025.6656 | Moderate |
| LLH | GLCM      | Cluster Shade                                  | m=0.61516 | b=9025.6656 | Moderate |
| LLH | GLCM      | Cluster Tendency                               | m=0.65616 | b=26.7418   | Moderate |

|     |           |                                               |           |               |          |
|-----|-----------|-----------------------------------------------|-----------|---------------|----------|
| LLH | GLCM      | Difference entropy                            | m=0.97071 | b=0.13536     | Moderate |
| LLH | GLCM      | Energy                                        | m=0.59879 | b=0.0035909   | Moderate |
| LLH | GLCM      | Entropy                                       | m=0.74344 | b=1.9087      | Moderate |
| LLH | GLCM      | Homogeneity 1                                 | m=0.86135 | b=0.054727    | Moderate |
| LLH | GLCM      | Homogeneity 2                                 | m=0.84288 | b=0.051211    | Moderate |
| LLH | GLCM      | Informational measure of correlation 2 (IMC2) | m=0.84902 | b=0.12889     | Moderate |
| LLH | GLCM      | Sum Average                                   | m=0.87976 | b=4.2325      | Moderate |
| LLH | GLCM      | Sum variance                                  | m=0.65616 | b=26.7418     | Moderate |
| LLH | GLCM      | Variance                                      | m=0.73312 | b=5.8139      | Moderate |
| LLH | GLRLM     | Short Run Emphasis (SRE)                      | m=0.75097 | b=0.22574     | Moderate |
| LLH | GLRLM     | Long Run Emphasis (LRE)                       | m=0.66362 | b=0.54016     | Moderate |
| LLH | GLRLM     | Run Percentage (RP)                           | m=0.75978 | b=0.20942     | Moderate |
| LLH | Histogram | Maximum                                       | m=0.86384 | b=0.085699    | Moderate |
| LLH | GLRLM     | Short Run Low Gray-Level Emphasis (SRLGLE)    | m=0.76808 | b=0.0014878   | Moderate |
| LLH | GLRLM     | Short Run High Gray-Level Emphasis (SRHGLE)   | m=0.78436 | b=65.9727     | Moderate |
| LLH | Histogram | Mean absolute deviation                       | m=1.1244  | b=-0.016822   | Moderate |
| LLH | Histogram | Third quartile                                | m=1.2707  | b=-0.0075729  | Moderate |
| LLH | Histogram | Minimum                                       | m=1.0907  | b=0.03045     | Moderate |
| LLH | Histogram | Range                                         | m=1.022   | b=0.031265    | Moderate |
| LLL | GLCM      | Autocorrelation                               | m=0.8966  | b=50.3396     | Moderate |
| LLL | GLCM      | Energy                                        | m=0.84078 | b=0.0010271   | Moderate |
| LLL | GLCM      | Entropy                                       | m=1.0457  | b=-0.37011    | Moderate |
| LLL | GLCM      | Informational measure of correlation 2 (IMC2) | m=1.086   | b=-0.075232   | Moderate |
| LLL | Histogram | Kurtosis                                      | m=0.68943 | b=-0.16314    | Moderate |
| LLL | GLCM      | Sum Average                                   | m=0.89333 | b=4.6496      | Moderate |
| LLL | GLCM      | Sum entropy                                   | m=1.0977  | b=-0.49335    | Moderate |
| LLL | GLCM      | Variance                                      | m=0.93225 | b=3.3225      | Moderate |
| LLL | GLRLM     | Short Run Low Gray-Level Emphasis (SRLGLE)    | m=0.98879 | b=-0.00037913 | Moderate |
| LLL | GLRLM     | Short Run High Gray-Level Emphasis (SRHGLE)   | m=0.89859 | b=41.7885     | Moderate |
| LLL | GLRLM     | Long Run High Gray-Level Emphasis (LRHGLE)    | m=0.90641 | b=66.0855     | Moderate |

---
